# Supplementary material for: Pan-Cancer Analysis of Potential Synthetic Lethal Drug Targets Specific to Alterations in DNA Damage Response
Source: Front Oncol. 2019 Oct 25;9:1136. doi: 10.3389/fonc.2019.01136 (PMC6823874; doi:10.3389/fonc.2019.01136)
Supplement: Supplementary Table 1 — This table contains a filtered list of the literature reported and predicted synthetic lethal interactions of DDR genes from 3 clusters in TCGA tumor types. The synthetic lethal interactions presented in this table has the following filters: (1) the primary gene (Gene1) has mutation in at-least 5 tumor samples from the corresponding TCGA tumor type (2) the primary gene (Gene1) and the synthetic lethal gene (Gene2) has significant conditional essentiality from the Achilles shRNA screening data (p < 0.1) (3) there is significant difference in survival between patients having high or low expression of the synthetic lethal gene (Gene2) in presence of mutation in Gene1 (p < 0.1) (4) there is significant difference in drug sensitivity for drugs targeting Gene2 in cell lines with or without mutation in Gene1 (p < 0.1). [file Table_1.XLSX]

## Sheet: DDRcluster_SLdrug_survival
cancer	Gene1	Gene2	PvalSurvival	Reported	ClusterGene1	DrugName	TargetPathway	PvalDrug	Reference (PMID)
GBM	TP53	TNK2	0.0436	1	2	Bosutinib	Kinases, kinases	0.00549557	22585861
BLCA	TP53	TNK2	0.0662	1	2	Bosutinib	Kinases, kinases	0.00549557	22585861
BRCA	BRCA2	PARP1	0.0535	1	2	Olaparib	Genome integrity	0.0891011	21487248;18832051;16287996;24317580;20233726;21205831;20124459;19362586;19053880;22101337;21777194;22562176;21368455;21285153;21821475;20832020;18388863;22010575;22778154;20049735;21424107;20406170;18388863
LUAD	BRCA2	CDK6	0.0476	1	2	Palbociclib	Cell cycle	0.0873147	28319113
LUSC	BRCA2	DDB1	0.0152	1	2	Lenalidomide	Protein stability and degradation	0.0192273	18832051
KIRC	CHEK2	PDGFRA	0.0363	1	3	Midostaurin	Kinases	2.02576e-05	28319113
BRCA	FANCM	ADRM1	0.0931	NA	1	Bortezomib	Protein stability and degradation	3.75027e-24	NA
BRCA	FANCM	AURKB	0.0931	NA	1	Midostaurin	Kinases	0.0201766	NA
BRCA	FANCM	BCR	0.069	NA	1	Bosutinib	Kinases, kinases	1.854e-10	NA
BRCA	FANCM	BCR	0.069	NA	1	Dasatinib	Kinases	9.92733e-19	NA
BRCA	FANCM	CDK2	0.0931	NA	1	Bosutinib	Kinases, kinases	1.854e-10	NA
BRCA	FANCM	CDK6	0.0101	NA	1	Palbociclib	Cell cycle	0.000143501	NA
BRCA	FANCM	FKBP1A	0.069	NA	1	Temsirolimus	PI3K/MTOR signaling	0.0408249	NA
BRCA	FANCM	FLT1	0.0476	NA	1	Axitinib	RTK signaling	0.000384692	NA
BRCA	FANCM	FOLH1	0.0476	NA	1	Docetaxel	Mitosis	2.63346e-12	NA
BRCA	FANCM	HDAC8	0.0476	NA	1	Vorinostat	Chromatin histone acetylation	0.00352865	NA
BRCA	FANCM	MAP2K1	0.0476	NA	1	Bosutinib	Kinases, kinases	1.854e-10	NA
BRCA	FANCM	MAP2K1	0.0476	NA	1	Trametinib	ERK MAPK signaling	6.75065e-06	NA
BRCA	FANCM	MAP2K3	0.0931	NA	1	Trametinib	ERK MAPK signaling	6.75065e-06	NA
BRCA	FANCM	MAP2K4	0.0931	NA	1	Trametinib	ERK MAPK signaling	6.75065e-06	NA
BRCA	FANCM	MAPT	0.0177	NA	1	Paclitaxel	Mitosis	4.27829e-06	NA
BRCA	FANCM	MAPT	0.0177	NA	1	Docetaxel	Mitosis	2.63346e-12	NA
BRCA	FANCM	PRKCG	0.0931	NA	1	Midostaurin	Kinases	0.0201766	NA
BRCA	FANCM	PSMC3IP	0.0931	NA	1	Bortezomib	Protein stability and degradation	3.75027e-24	NA
BRCA	FANCM	PSMD12	0.0931	NA	1	Bortezomib	Protein stability and degradation	3.75027e-24	NA
BRCA	FANCM	PSMD14	0.0931	NA	1	Bortezomib	Protein stability and degradation	3.75027e-24	NA
BRCA	FANCM	PSME4	0.0931	NA	1	Bortezomib	Protein stability and degradation	3.75027e-24	NA
BRCA	FANCM	RXRA	0.0177	NA	1	Bexarotene	Retinoid X receptors	2.9583e-07	NA
BRCA	FANCM	RXRB	0.0101	NA	1	Bexarotene	Retinoid X receptors	2.9583e-07	NA
BRCA	FANCM	STK24	0.0177	NA	1	Bosutinib	Kinases, kinases	1.854e-10	NA
BRCA	FANCM	TNK2	0.0177	NA	1	Bosutinib	Kinases, kinases	1.854e-10	NA
BRCA	FANCM	TUBA1C	0.0931	NA	1	Paclitaxel	Mitosis	4.27829e-06	NA
BRCA	FANCM	TUBA3D	0.0177	NA	1	Paclitaxel	Mitosis	4.27829e-06	NA
BRCA	FANCM	TUBB	0.0931	NA	1	Paclitaxel	Mitosis	4.27829e-06	NA
BRCA	FANCM	TUBB	0.0931	NA	1	Docetaxel	Mitosis	2.63346e-12	NA
BRCA	FANCM	TXK	0.0101	NA	1	Bosutinib	Kinases, kinases	1.854e-10	NA
LUAD	FANCM	C1QA	0.0578	NA	1	Cetuximab	EGFR signaling	5.29532e-05	NA
LUAD	FANCM	C1QB	0.00184	NA	1	Cetuximab	EGFR signaling	5.29532e-05	NA
LUAD	FANCM	C1QC	0.00184	NA	1	Cetuximab	EGFR signaling	5.29532e-05	NA
LUAD	FANCM	FCGR3A	0.0342	NA	1	Cetuximab	EGFR signaling	5.29532e-05	NA
LUAD	FANCM	LYN	0.0899	NA	1	Bosutinib	Kinases, kinases	1.854e-10	NA
LUAD	FANCM	LYN	0.0899	NA	1	Dasatinib	Kinases	9.92733e-19	NA
LUAD	FANCM	PRKCI	0.0899	NA	1	Midostaurin	Kinases	0.0201766	NA
LUAD	FANCM	PSMC6	0.00184	NA	1	Bortezomib	Protein stability and degradation	3.75027e-24	NA
LUAD	FANCM	PSMD7	0.0197	NA	1	Bortezomib	Protein stability and degradation	3.75027e-24	NA
LUAD	FANCM	TNK2	0.0578	NA	1	Bosutinib	Kinases, kinases	1.854e-10	NA
LUAD	FANCM	TUBA3E	0.00184	NA	1	Paclitaxel	Mitosis	4.27829e-06	NA
LUAD	FANCM	TUBB8	0.00642	NA	1	Paclitaxel	Mitosis	4.27829e-06	NA
LUAD	FANCM	TXK	0.0679	NA	1	Bosutinib	Kinases, kinases	1.854e-10	NA
LUSC	FANCM	C1R	0.0763	NA	1	Cetuximab	EGFR signaling	5.29532e-05	NA
LUSC	FANCM	DDR2	0.072	NA	1	Dasatinib	Kinases	9.92733e-19	NA
LUSC	FANCM	FYN	0.0314	NA	1	Dasatinib	Kinases	9.92733e-19	NA
LUSC	FANCM	FYN	0.0314	NA	1	Bosutinib	Kinases, kinases	1.854e-10	NA
LUSC	FANCM	PDGFRA	0.072	NA	1	Midostaurin	Kinases	0.0201766	NA
LUSC	FANCM	PIK3CA	0.072	NA	1	Idelalisib	PI3K/MTOR signaling	0.0648145	NA
LUSC	FANCM	PSMC3	0.0118	NA	1	Bortezomib	Protein stability and degradation	3.75027e-24	NA
LUSC	FANCM	PSMC5	0.036	NA	1	Bortezomib	Protein stability and degradation	3.75027e-24	NA
LUSC	FANCM	TNK2	0.072	NA	1	Bosutinib	Kinases, kinases	1.854e-10	NA
LUSC	FANCM	TUBA1A	0.072	NA	1	Paclitaxel	Mitosis	4.27829e-06	NA
LIHC	FANCM	ABL1	0.00922	NA	1	Dasatinib	Kinases	9.92733e-19	NA
LIHC	FANCM	ABL1	0.00922	NA	1	Bosutinib	Kinases, kinases	1.854e-10	NA
LIHC	FANCM	ABL2	0.0166	NA	1	Dasatinib	Kinases	9.92733e-19	NA
LIHC	FANCM	ABL2	0.0166	NA	1	Bosutinib	Kinases, kinases	1.854e-10	NA
LIHC	FANCM	FCGR3B	0.0854	NA	1	Cetuximab	EGFR signaling	5.29532e-05	NA
LIHC	FANCM	LYN	0.0489	NA	1	Bosutinib	Kinases, kinases	1.854e-10	NA
LIHC	FANCM	LYN	0.0489	NA	1	Dasatinib	Kinases	9.92733e-19	NA
LIHC	FANCM	MAP2K3	0.0591	NA	1	Trametinib	ERK MAPK signaling	6.75065e-06	NA
LIHC	FANCM	MAP4K5	0.0679	NA	1	Bosutinib	Kinases, kinases	1.854e-10	NA
LIHC	FANCM	PRKCZ	0.00269	NA	1	Midostaurin	Kinases	0.0201766	NA
LIHC	FANCM	PSME1	0.0651	NA	1	Bortezomib	Protein stability and degradation	3.75027e-24	NA
LIHC	FANCM	PSMF1	0.012	NA	1	Bortezomib	Protein stability and degradation	3.75027e-24	NA
LIHC	FANCM	TUBA3D	0.0409	NA	1	Paclitaxel	Mitosis	4.27829e-06	NA
LIHC	FANCM	TXK	0.0679	NA	1	Bosutinib	Kinases, kinases	1.854e-10	NA
COADREAD	TP53	CAMK2G	0.0896	NA	2	Bosutinib	Kinases, kinases	0.00549557	NA
COADREAD	TP53	CCND1	0.0896	NA	2	Palbociclib	Cell cycle	0.0587269	NA
COADREAD	TP53	CDH5	0.0896	NA	2	Lenalidomide	Protein stability and degradation	0.0517071	NA
COADREAD	TP53	CDK2	0.0896	NA	2	Bosutinib	Kinases, kinases	0.00549557	NA
COADREAD	TP53	FLT1	0.0896	NA	2	Axitinib	RTK signaling	9.32585e-06	NA
COADREAD	TP53	FYN	0.0896	NA	2	Dasatinib	Kinases	0.00644064	NA
COADREAD	TP53	FYN	0.0896	NA	2	Bosutinib	Kinases, kinases	0.00549557	NA
COADREAD	TP53	HDAC11	0.0896	NA	2	Vorinostat	Chromatin histone acetylation	0.00387802	NA
COADREAD	TP53	HDAC5	0.0896	NA	2	Vorinostat	Chromatin histone acetylation	0.00387802	NA
COADREAD	TP53	HDAC7	0.0896	NA	2	Vorinostat	Chromatin histone acetylation	0.00387802	NA
COADREAD	TP53	LIG3	0.0896	NA	2	Bleomycin	DNA replication	0.00802449	NA
COADREAD	TP53	LIMK1	0.0896	NA	2	Dabrafenib	ERK MAPK signaling	3.03638e-15	NA
COADREAD	TP53	LYN	0.0896	NA	2	Bosutinib	Kinases, kinases	0.00549557	NA
COADREAD	TP53	LYN	0.0896	NA	2	Dasatinib	Kinases	0.00644064	NA
COADREAD	TP53	MAP2K1	0.0896	NA	2	Bosutinib	Kinases, kinases	0.00549557	NA
COADREAD	TP53	MAP2K1	0.0896	NA	2	Trametinib	ERK MAPK signaling	5.69182e-05	NA
COADREAD	TP53	MAP2K6	0.0896	NA	2	Trametinib	ERK MAPK signaling	5.69182e-05	NA
COADREAD	TP53	PARP2	0.0896	NA	2	Olaparib	Genome integrity	0.000605345	NA
COADREAD	TP53	PDGFB	0.0896	NA	2	Axitinib	RTK signaling	9.32585e-06	NA
COADREAD	TP53	PLK4	0.0896	NA	2	Axitinib	RTK signaling	9.32585e-06	NA
COADREAD	TP53	PRKCG	0.0896	NA	2	Midostaurin	Kinases	9.57562e-09	NA
COADREAD	TP53	PRKCH	0.0896	NA	2	Midostaurin	Kinases	9.57562e-09	NA
COADREAD	TP53	PRKD3	0.0896	NA	2	Midostaurin	Kinases	9.57562e-09	NA
COADREAD	TP53	PSMA3	0.0896	NA	2	Bortezomib	Protein stability and degradation	0.0209589	NA
COADREAD	TP53	PSMB7	0.0896	NA	2	Bortezomib	Protein stability and degradation	0.0209589	NA
COADREAD	TP53	PSMC3IP	0.0896	NA	2	Bortezomib	Protein stability and degradation	0.0209589	NA
COADREAD	TP53	PSMD10	0.0896	NA	2	Bortezomib	Protein stability and degradation	0.0209589	NA
COADREAD	TP53	PSMD11	0.0896	NA	2	Bortezomib	Protein stability and degradation	0.0209589	NA
COADREAD	TP53	PSMD3	0.0896	NA	2	Bortezomib	Protein stability and degradation	0.0209589	NA
COADREAD	TP53	PSMD5	0.0896	NA	2	Bortezomib	Protein stability and degradation	0.0209589	NA
COADREAD	TP53	RAF1	0.0896	NA	2	Dabrafenib	ERK MAPK signaling	3.03638e-15	NA
COADREAD	TP53	SRC	0.0896	NA	2	Dasatinib	Kinases	0.00644064	NA
COADREAD	TP53	SRC	0.0896	NA	2	Bosutinib	Kinases, kinases	0.00549557	NA
COADREAD	TP53	STK10	0.0896	NA	2	Bosutinib	Kinases, kinases	0.00549557	NA
COADREAD	TP53	TNF	0.0896	NA	2	Lenalidomide	Protein stability and degradation	0.0517071	NA
COADREAD	TP53	YES1	0.0896	NA	2	Dasatinib	Kinases	0.00644064	NA
BRCA	TP53	CDK6	0.0174	NA	2	Palbociclib	Cell cycle	0.0587269	NA
BRCA	TP53	DRD2	0.059	NA	2	Palbociclib	Cell cycle	0.0587269	NA
BRCA	TP53	EPHA2	0.0711	NA	2	Dasatinib	Kinases	0.00644064	NA
BRCA	TP53	FRK	0.0987	NA	2	Dasatinib	Kinases	0.00644064	NA
BRCA	TP53	FRK	0.0987	NA	2	Bosutinib	Kinases, kinases	0.00549557	NA
BRCA	TP53	HDAC8	0.0389	NA	2	Vorinostat	Chromatin histone acetylation	0.00387802	NA
BRCA	TP53	LIG1	0.0551	NA	2	Bleomycin	DNA replication	0.00802449	NA
BRCA	TP53	MAP2K6	0.0552	NA	2	Trametinib	ERK MAPK signaling	5.69182e-05	NA
BRCA	TP53	PDGFRB	0.0238	NA	2	Dasatinib	Kinases	0.00644064	NA
BRCA	TP53	PDGFRB	0.0238	NA	2	Midostaurin	Kinases	9.57562e-09	NA
BRCA	TP53	PDGFRB	0.0238	NA	2	Axitinib	RTK signaling	9.32585e-06	NA
BRCA	TP53	PDGFRB	0.0238	NA	2	Nilotinib	ABL signaling	0.0105721	NA
BRCA	TP53	PLK4	0.0854	NA	2	Axitinib	RTK signaling	9.32585e-06	NA
BRCA	TP53	PRKCH	0.0369	NA	2	Midostaurin	Kinases	9.57562e-09	NA
BRCA	TP53	PSMA6	0.0375	NA	2	Bortezomib	Protein stability and degradation	0.0209589	NA
BRCA	TP53	PSMC6	0.0183	NA	2	Bortezomib	Protein stability and degradation	0.0209589	NA
BRCA	TP53	PSMD1	0.0684	NA	2	Bortezomib	Protein stability and degradation	0.0209589	NA
BRCA	TP53	YES1	0.0528	NA	2	Dasatinib	Kinases	0.00644064	NA
GBM	TP53	HCK	0.0143	NA	2	Bosutinib	Kinases, kinases	0.00549557	NA
GBM	TP53	HCK	0.0143	NA	2	Dasatinib	Kinases	0.00644064	NA
GBM	TP53	KDR	0.0884	NA	2	Axitinib	RTK signaling	9.32585e-06	NA
GBM	TP53	KDR	0.0884	NA	2	Midostaurin	Kinases	9.57562e-09	NA
GBM	TP53	LCK	0.0649	NA	2	Dasatinib	Kinases	0.00644064	NA
GBM	TP53	LYN	0.0122	NA	2	Bosutinib	Kinases, kinases	0.00549557	NA
GBM	TP53	LYN	0.0122	NA	2	Dasatinib	Kinases	0.00644064	NA
GBM	TP53	PRKCD	0.0412	NA	2	Midostaurin	Kinases	9.57562e-09	NA
GBM	TP53	STK10	0.0196	NA	2	Bosutinib	Kinases, kinases	0.00549557	NA
HNSC	ERCC5	HDAC6	0.0896	NA	2	Vorinostat	Chromatin histone acetylation	7.02239e-11	NA
HNSC	ERCC5	HDAC6	0.0896	NA	2	Belinostat	Chromatin histone acetylation	0.000219929	NA
HNSC	ERCC5	MET	0.0896	NA	2	Alectinib	RTK signaling	1.23104e-05	NA
BLCA	TP53	ABL1	1.13e-05	NA	2	Dasatinib	Kinases	0.00644064	NA
BLCA	TP53	ABL1	1.13e-05	NA	2	Nilotinib	ABL signaling	0.0105721	NA
BLCA	TP53	ABL1	1.13e-05	NA	2	Bosutinib	Kinases, kinases	0.00549557	NA
BLCA	TP53	CDK6	0.0557	NA	2	Palbociclib	Cell cycle	0.0587269	NA
BLCA	TP53	CUL4A	0.0117	NA	2	Lenalidomide	Protein stability and degradation	0.0517071	NA
BLCA	TP53	FLT3	0.049	NA	2	Midostaurin	Kinases	9.57562e-09	NA
BLCA	TP53	FLT3	0.049	NA	2	Bortezomib	Protein stability and degradation	0.0209589	NA
BLCA	TP53	FLT4	0.0711	NA	2	Axitinib	RTK signaling	9.32585e-06	NA
BLCA	TP53	HDAC5	0.00181	NA	2	Vorinostat	Chromatin histone acetylation	0.00387802	NA
BLCA	TP53	HDAC6	0.0154	NA	2	Vorinostat	Chromatin histone acetylation	0.00387802	NA
BLCA	TP53	HDAC7	0.0351	NA	2	Vorinostat	Chromatin histone acetylation	0.00387802	NA
BLCA	TP53	KDR	0.0932	NA	2	Axitinib	RTK signaling	9.32585e-06	NA
BLCA	TP53	KDR	0.0932	NA	2	Midostaurin	Kinases	9.57562e-09	NA
BLCA	TP53	LCK	0.0905	NA	2	Dasatinib	Kinases	0.00644064	NA
BLCA	TP53	LIMK1	0.00994	NA	2	Dabrafenib	ERK MAPK signaling	3.03638e-15	NA
BLCA	TP53	MAP2K4	0.0134	NA	2	Trametinib	ERK MAPK signaling	5.69182e-05	NA
BLCA	TP53	MAP2K7	0.0305	NA	2	Trametinib	ERK MAPK signaling	5.69182e-05	NA
BLCA	TP53	MTOR	0.00671	NA	2	Temsirolimus	PI3K/MTOR signaling	0.030214	NA
BLCA	TP53	PIK3CA	0.011	NA	2	Idelalisib	PI3K/MTOR signaling	0.0453945	NA
BLCA	TP53	PRKD3	0.0646	NA	2	Midostaurin	Kinases	9.57562e-09	NA
BLCA	TP53	PSMC4	0.0289	NA	2	Bortezomib	Protein stability and degradation	0.0209589	NA
BLCA	TP53	PSMD3	0.0247	NA	2	Bortezomib	Protein stability and degradation	0.0209589	NA
BLCA	TP53	SIK2	0.0062	NA	2	Bosutinib	Kinases, kinases	0.00549557	NA
BLCA	TP53	SIK2	0.0062	NA	2	Dasatinib	Kinases	0.00644064	NA
BLCA	TP53	STAT5B	0.0247	NA	2	Dasatinib	Kinases	0.00644064	NA
BLCA	TP53	STK4	0.0722	NA	2	Bosutinib	Kinases, kinases	0.00549557	NA
CESC	TP53	BCR	0.057	NA	2	Bosutinib	Kinases, kinases	0.00549557	NA
CESC	TP53	BCR	0.057	NA	2	Dasatinib	Kinases	0.00644064	NA
CESC	TP53	DDB1	0.0895	NA	2	Lenalidomide	Protein stability and degradation	0.0517071	NA
CESC	TP53	HDAC3	0.0895	NA	2	Vorinostat	Chromatin histone acetylation	0.00387802	NA
CESC	TP53	MAP2K1	0.0192	NA	2	Bosutinib	Kinases, kinases	0.00549557	NA
CESC	TP53	MAP2K1	0.0192	NA	2	Trametinib	ERK MAPK signaling	5.69182e-05	NA
CESC	TP53	NOS2	0.0089	NA	2	Nilotinib	ABL signaling	0.0105721	NA
CESC	TP53	PSMA3	0.0361	NA	2	Bortezomib	Protein stability and degradation	0.0209589	NA
CESC	TP53	PSMC5	0.0895	NA	2	Bortezomib	Protein stability and degradation	0.0209589	NA
CESC	TP53	PSMD2	0.0895	NA	2	Bortezomib	Protein stability and degradation	0.0209589	NA
CESC	TP53	SIK2	0.057	NA	2	Bosutinib	Kinases, kinases	0.00549557	NA
CESC	TP53	SIK2	0.057	NA	2	Dasatinib	Kinases	0.00644064	NA
CESC	TP53	STAT5B	0.0361	NA	2	Dasatinib	Kinases	0.00644064	NA
LGG	TP53	HDAC2	0.00114	NA	2	Vorinostat	Chromatin histone acetylation	0.00387802	NA
LGG	TP53	HDAC6	0.0173	NA	2	Vorinostat	Chromatin histone acetylation	0.00387802	NA
LGG	TP53	LIG3	0.00138	NA	2	Bleomycin	DNA replication	0.00802449	NA
LGG	TP53	PDGFRA	0.0453	NA	2	Midostaurin	Kinases	9.57562e-09	NA
LGG	TP53	PDGFRA	0.0453	NA	2	Nilotinib	ABL signaling	0.0105721	NA
LGG	TP53	PIK3CA	0.0175	NA	2	Idelalisib	PI3K/MTOR signaling	0.0453945	NA
LGG	TP53	SIK2	0.0763	NA	2	Bosutinib	Kinases, kinases	0.00549557	NA
LGG	TP53	SIK2	0.0763	NA	2	Dasatinib	Kinases	0.00644064	NA
LGG	TP53	TXK	0.0103	NA	2	Bosutinib	Kinases, kinases	0.00549557	NA
BRCA	RAD50	ABL2	0.0363	NA	2	Dasatinib	Kinases	9.05145e-06	NA
BRCA	RAD50	BAX	0.0363	NA	2	Bortezomib	Protein stability and degradation	4.18027e-30	NA
BRCA	RAD50	BLK	0.0363	NA	2	Dasatinib	Kinases	9.05145e-06	NA
BRCA	RAD50	FGR	0.0363	NA	2	Dasatinib	Kinases	9.05145e-06	NA
BRCA	RAD50	LYN	0.0363	NA	2	Dasatinib	Kinases	9.05145e-06	NA
BRCA	RAD50	PRKCB	0.0363	NA	2	Midostaurin	Kinases	0.0354187	NA
BRCA	RAD50	PRKCH	0.0363	NA	2	Midostaurin	Kinases	0.0354187	NA
BRCA	RAD50	PRKCQ	0.0363	NA	2	Midostaurin	Kinases	0.0354187	NA
BRCA	RAD50	PSMA1	0.0363	NA	2	Bortezomib	Protein stability and degradation	4.18027e-30	NA
BRCA	RAD50	PSMA3	0.0363	NA	2	Bortezomib	Protein stability and degradation	4.18027e-30	NA
BRCA	RAD50	PSMA6	0.0363	NA	2	Bortezomib	Protein stability and degradation	4.18027e-30	NA
BRCA	RAD50	PSMA8	0.0363	NA	2	Bortezomib	Protein stability and degradation	4.18027e-30	NA
BRCA	RAD50	PSMC3IP	0.0363	NA	2	Bortezomib	Protein stability and degradation	4.18027e-30	NA
BRCA	RAD50	PSMC4	0.0363	NA	2	Bortezomib	Protein stability and degradation	4.18027e-30	NA
BRCA	RAD50	PSMC6	0.0363	NA	2	Bortezomib	Protein stability and degradation	4.18027e-30	NA
BRCA	RAD50	PSMF1	0.0363	NA	2	Bortezomib	Protein stability and degradation	4.18027e-30	NA
HNSC	BRCA2	BRAF	0.00221	NA	2	Dabrafenib	ERK MAPK signaling	0.000315445	NA
HNSC	BRCA2	BRAF	0.00221	NA	2	Temsirolimus	PI3K/MTOR signaling	0.000978067	NA
HNSC	BRCA2	FRK	0.0148	NA	2	Bosutinib	Kinases, kinases	0.082348	NA
HNSC	BRCA2	LIMK1	0.0235	NA	2	Dabrafenib	ERK MAPK signaling	0.000315445	NA
HNSC	BRCA2	SRC	0.0283	NA	2	Bosutinib	Kinases, kinases	0.082348	NA
HNSC	BRCA2	TUBB1	0.0854	NA	2	Docetaxel	Mitosis	5.6481e-06	NA
BRCA	BRCA2	CCND1	0.017	NA	2	Palbociclib	Cell cycle	0.0873147	NA
BRCA	BRCA2	CDH5	0.0575	NA	2	Lenalidomide	Protein stability and degradation	0.0192273	NA
BRCA	BRCA2	CDK2	0.0457	NA	2	Bosutinib	Kinases, kinases	0.082348	NA
BRCA	BRCA2	HDAC2	0.0177	NA	2	Vorinostat	Chromatin histone acetylation	6.59835e-06	NA
BRCA	BRCA2	MAP2	0.091	NA	2	Docetaxel	Mitosis	5.6481e-06	NA
BRCA	BRCA2	MAP2K6	0.0275	NA	2	Trametinib	ERK MAPK signaling	7.86565e-06	NA
BRCA	BRCA2	MAP4	0.00439	NA	2	Docetaxel	Mitosis	5.6481e-06	NA
BRCA	BRCA2	MAP4K5	0.0909	NA	2	Bosutinib	Kinases, kinases	0.082348	NA
BRCA	BRCA2	MAPT	0.0887	NA	2	Docetaxel	Mitosis	5.6481e-06	NA
BRCA	BRCA2	PDGFB	0.0715	NA	2	Axitinib	RTK signaling	0.0318369	NA
BRCA	BRCA2	PDGFRA	0.0615	NA	2	Nilotinib	ABL signaling	0.00280325	NA
BRCA	BRCA2	PDGFRB	0.0263	NA	2	Axitinib	RTK signaling	0.0318369	NA
BRCA	BRCA2	PDGFRB	0.0263	NA	2	Nilotinib	ABL signaling	0.00280325	NA
OV	TP53	LCK	0.055	NA	2	Dasatinib	Kinases	0.00644064	NA
OV	TP53	MAP2K6	0.048	NA	2	Trametinib	ERK MAPK signaling	5.69182e-05	NA
OV	TP53	PDGFRB	0.0726	NA	2	Dasatinib	Kinases	0.00644064	NA
OV	TP53	PDGFRB	0.0726	NA	2	Midostaurin	Kinases	9.57562e-09	NA
OV	TP53	PDGFRB	0.0726	NA	2	Axitinib	RTK signaling	9.32585e-06	NA
OV	TP53	PDGFRB	0.0726	NA	2	Nilotinib	ABL signaling	0.0105721	NA
OV	TP53	PSMB1	0.0544	NA	2	Bortezomib	Protein stability and degradation	0.0209589	NA
KIRC	TP53	BCL2	0.0724	NA	2	Bortezomib	Protein stability and degradation	0.0209589	NA
PAAD	TP53	CSF1R	0.042	NA	2	Dasatinib	Kinases	0.00644064	NA
PAAD	TP53	HDAC6	0.0931	NA	2	Vorinostat	Chromatin histone acetylation	0.00387802	NA
PAAD	TP53	LIG3	0.00987	NA	2	Bleomycin	DNA replication	0.00802449	NA
PAAD	TP53	MTOR	0.0481	NA	2	Temsirolimus	PI3K/MTOR signaling	0.030214	NA
PAAD	TP53	PRKD3	0.0931	NA	2	Midostaurin	Kinases	9.57562e-09	NA
PAAD	TP53	PSMB4	0.05	NA	2	Bortezomib	Protein stability and degradation	0.0209589	NA
KIRC	TP53	PIK3CA	0.0459	NA	2	Idelalisib	PI3K/MTOR signaling	0.0453945	NA
KIRC	TP53	PRKD1	0.0517	NA	2	Midostaurin	Kinases	9.57562e-09	NA
KIRC	TP53	PSMD7	0.0211	NA	2	Bortezomib	Protein stability and degradation	0.0209589	NA
KIRC	TP53	PSMF1	0.0848	NA	2	Bortezomib	Protein stability and degradation	0.0209589	NA
KIRC	TP53	PTGS2	0.0157	NA	2	Lenalidomide	Protein stability and degradation	0.0517071	NA
KIRC	TP53	SIK1	0.0464	NA	2	Dabrafenib	ERK MAPK signaling	3.03638e-15	NA
KIRC	TP53	SIK1	0.0464	NA	2	Bosutinib	Kinases, kinases	0.00549557	NA
KIRC	TP53	SIK1	0.0464	NA	2	Dasatinib	Kinases	0.00644064	NA
HNSC	TP53	CSF1	0.0507	NA	2	Axitinib	RTK signaling	9.32585e-06	NA
HNSC	TP53	HCK	0.00341	NA	2	Bosutinib	Kinases, kinases	0.00549557	NA
HNSC	TP53	HCK	0.00341	NA	2	Dasatinib	Kinases	0.00644064	NA
HNSC	TP53	KIT	0.0889	NA	2	Dasatinib	Kinases	0.00644064	NA
HNSC	TP53	KIT	0.0889	NA	2	Nilotinib	ABL signaling	0.0105721	NA
HNSC	TP53	KIT	0.0889	NA	2	Midostaurin	Kinases	9.57562e-09	NA
HNSC	TP53	KIT	0.0889	NA	2	Axitinib	RTK signaling	9.32585e-06	NA
HNSC	TP53	LIMK1	0.000274	NA	2	Dabrafenib	ERK MAPK signaling	3.03638e-15	NA
HNSC	TP53	LYN	0.0536	NA	2	Bosutinib	Kinases, kinases	0.00549557	NA
HNSC	TP53	LYN	0.0536	NA	2	Dasatinib	Kinases	0.00644064	NA
HNSC	TP53	PARP2	0.0977	NA	2	Olaparib	Genome integrity	0.000605345	NA
HNSC	TP53	PIK3CG	0.007	NA	2	Idelalisib	PI3K/MTOR signaling	0.0453945	NA
HNSC	TP53	PRKCB	0.0867	NA	2	Midostaurin	Kinases	9.57562e-09	NA
HNSC	TP53	PRKCD	0.00733	NA	2	Midostaurin	Kinases	9.57562e-09	NA
HNSC	TP53	PRKD1	0.00198	NA	2	Midostaurin	Kinases	9.57562e-09	NA
HNSC	TP53	PSMA1	0.0123	NA	2	Bortezomib	Protein stability and degradation	0.0209589	NA
HNSC	TP53	PSMA5	0.0196	NA	2	Bortezomib	Protein stability and degradation	0.0209589	NA
HNSC	TP53	PSMC1	0.0365	NA	2	Bortezomib	Protein stability and degradation	0.0209589	NA
HNSC	TP53	SLK	0.0644	NA	2	Dasatinib	Kinases	0.00644064	NA
HNSC	TP53	SRC	0.0219	NA	2	Dasatinib	Kinases	0.00644064	NA
HNSC	TP53	SRC	0.0219	NA	2	Bosutinib	Kinases, kinases	0.00549557	NA
HNSC	TP53	TNFSF11	0.065	NA	2	Lenalidomide	Protein stability and degradation	0.0517071	NA
HNSC	TP53	YES1	0.0868	NA	2	Dasatinib	Kinases	0.00644064	NA
BLCA	ERCC2	ADRM1	0.017	NA	2	Bortezomib	Protein stability and degradation	0.0104144	NA
BLCA	ERCC2	PSMA5	0.0815	NA	2	Bortezomib	Protein stability and degradation	0.0104144	NA
BLCA	ERCC2	PSMB6	0.0524	NA	2	Bortezomib	Protein stability and degradation	0.0104144	NA
BLCA	ERCC2	PSMC6	0.034	NA	2	Bortezomib	Protein stability and degradation	0.0104144	NA
BLCA	ERCC2	PSMD12	0.0295	NA	2	Bortezomib	Protein stability and degradation	0.0104144	NA
BLCA	BRCA2	FYN	0.017	NA	2	Bosutinib	Kinases, kinases	0.082348	NA
BLCA	BRCA2	HDAC3	0.0918	NA	2	Vorinostat	Chromatin histone acetylation	6.59835e-06	NA
BLCA	BRCA2	KDR	0.017	NA	2	Axitinib	RTK signaling	0.0318369	NA
BLCA	BRCA2	MAPT	0.017	NA	2	Docetaxel	Mitosis	5.6481e-06	NA
BLCA	BRCA2	TXK	0.017	NA	2	Bosutinib	Kinases, kinases	0.082348	NA
SKCM	TP53	CUL4A	0.0773	NA	2	Lenalidomide	Protein stability and degradation	0.0517071	NA
SKCM	TP53	FRK	0.0207	NA	2	Dasatinib	Kinases	0.00644064	NA
SKCM	TP53	FRK	0.0207	NA	2	Bosutinib	Kinases, kinases	0.00549557	NA
SKCM	TP53	HDAC2	0.0773	NA	2	Vorinostat	Chromatin histone acetylation	0.00387802	NA
SKCM	TP53	MAP2K4	0.0773	NA	2	Trametinib	ERK MAPK signaling	5.69182e-05	NA
SKCM	TP53	NOS2	0.0943	NA	2	Nilotinib	ABL signaling	0.0105721	NA
SKCM	TP53	PARP2	0.051	NA	2	Olaparib	Genome integrity	0.000605345	NA
SKCM	TP53	PIPSL	0.0117	NA	2	Bortezomib	Protein stability and degradation	0.0209589	NA
SKCM	TP53	PRKCB	0.0943	NA	2	Midostaurin	Kinases	9.57562e-09	NA
SKCM	TP53	PRKCI	0.0943	NA	2	Midostaurin	Kinases	9.57562e-09	NA
SKCM	TP53	PSMA8	0.051	NA	2	Bortezomib	Protein stability and degradation	0.0209589	NA
SKCM	TP53	PSMC3	0.0207	NA	2	Bortezomib	Protein stability and degradation	0.0209589	NA
SKCM	TP53	PSMD1	0.0207	NA	2	Bortezomib	Protein stability and degradation	0.0209589	NA
SKCM	TP53	PSMD5	0.051	NA	2	Bortezomib	Protein stability and degradation	0.0209589	NA
SKCM	TP53	PTGS2	0.051	NA	2	Lenalidomide	Protein stability and degradation	0.0517071	NA
SKCM	TP53	SRC	0.0773	NA	2	Dasatinib	Kinases	0.00644064	NA
SKCM	TP53	SRC	0.0773	NA	2	Bosutinib	Kinases, kinases	0.00549557	NA
SKCM	TP53	STAT5B	0.0207	NA	2	Dasatinib	Kinases	0.00644064	NA
SKCM	TP53	STK24	0.0943	NA	2	Bosutinib	Kinases, kinases	0.00549557	NA
SKCM	TP53	TNF	0.0117	NA	2	Lenalidomide	Protein stability and degradation	0.0517071	NA
SKCM	TP53	TXK	0.0943	NA	2	Bosutinib	Kinases, kinases	0.00549557	NA
KIRC	BRCA2	DDR1	0.0931	NA	2	Nilotinib	ABL signaling	0.00280325	NA
LUSC	TP53	CDH5	0.0871	NA	2	Lenalidomide	Protein stability and degradation	0.0517071	NA
LUSC	TP53	CSF1R	0.0511	NA	2	Dasatinib	Kinases	0.00644064	NA
LUSC	TP53	FLT1	0.0492	NA	2	Axitinib	RTK signaling	9.32585e-06	NA
LUSC	TP53	FLT4	0.0282	NA	2	Axitinib	RTK signaling	9.32585e-06	NA
LUSC	TP53	KIT	0.0778	NA	2	Dasatinib	Kinases	0.00644064	NA
LUSC	TP53	KIT	0.0778	NA	2	Nilotinib	ABL signaling	0.0105721	NA
LUSC	TP53	KIT	0.0778	NA	2	Midostaurin	Kinases	9.57562e-09	NA
LUSC	TP53	KIT	0.0778	NA	2	Axitinib	RTK signaling	9.32585e-06	NA
LUSC	TP53	MAP2K6	0.0207	NA	2	Trametinib	ERK MAPK signaling	5.69182e-05	NA
LUSC	TP53	PDGFRB	0.0286	NA	2	Dasatinib	Kinases	0.00644064	NA
LUSC	TP53	PDGFRB	0.0286	NA	2	Midostaurin	Kinases	9.57562e-09	NA
LUSC	TP53	PDGFRB	0.0286	NA	2	Axitinib	RTK signaling	9.32585e-06	NA
LUSC	TP53	PDGFRB	0.0286	NA	2	Nilotinib	ABL signaling	0.0105721	NA
LUSC	TP53	PRKCQ	0.0937	NA	2	Midostaurin	Kinases	9.57562e-09	NA
LUSC	TP53	PRKD1	0.027	NA	2	Midostaurin	Kinases	9.57562e-09	NA
LUSC	TP53	PSMA8	0.0927	NA	2	Bortezomib	Protein stability and degradation	0.0209589	NA
HNSC	RAD50	AURKB	0.0331	NA	2	Midostaurin	Kinases	0.0354187	NA
HNSC	RAD50	FGR	0.0237	NA	2	Dasatinib	Kinases	9.05145e-06	NA
HNSC	RAD50	FLT3	0.0237	NA	2	Midostaurin	Kinases	0.0354187	NA
HNSC	RAD50	FLT3	0.0237	NA	2	Bortezomib	Protein stability and degradation	4.18027e-30	NA
HNSC	RAD50	HCK	0.0237	NA	2	Dasatinib	Kinases	9.05145e-06	NA
HNSC	RAD50	LCK	0.0237	NA	2	Dasatinib	Kinases	9.05145e-06	NA
HNSC	RAD50	PRKCB	0.0237	NA	2	Midostaurin	Kinases	0.0354187	NA
HNSC	RAD50	PRKCI	0.0431	NA	2	Midostaurin	Kinases	0.0354187	NA
HNSC	RAD50	PRKCQ	0.0773	NA	2	Midostaurin	Kinases	0.0354187	NA
HNSC	RAD50	PRKCZ	0.0836	NA	2	Midostaurin	Kinases	0.0354187	NA
HNSC	RAD50	PSMB8	0.0331	NA	2	Bortezomib	Protein stability and degradation	4.18027e-30	NA
HNSC	RAD50	PSMD2	0.0431	NA	2	Bortezomib	Protein stability and degradation	4.18027e-30	NA
HNSC	RAD50	PSME1	0.00569	NA	2	Bortezomib	Protein stability and degradation	4.18027e-30	NA
HNSC	RAD50	PSME2	0.00569	NA	2	Bortezomib	Protein stability and degradation	4.18027e-30	NA
LUAD	BRCA2	DDR1	0.0143	NA	2	Nilotinib	ABL signaling	0.00280325	NA
LUAD	BRCA2	MAPT	0.0574	NA	2	Docetaxel	Mitosis	5.6481e-06	NA
LIHC	TP53	BCR	0.0216	NA	2	Bosutinib	Kinases, kinases	0.00549557	NA
LIHC	TP53	BCR	0.0216	NA	2	Dasatinib	Kinases	0.00644064	NA
LIHC	TP53	MAP4K5	0.0696	NA	2	Bosutinib	Kinases, kinases	0.00549557	NA
LIHC	TP53	PIPSL	0.0805	NA	2	Bortezomib	Protein stability and degradation	0.0209589	NA
LIHC	TP53	PRKD1	0.0898	NA	2	Midostaurin	Kinases	9.57562e-09	NA
LIHC	TP53	PSMD1	0.0936	NA	2	Bortezomib	Protein stability and degradation	0.0209589	NA
LIHC	TP53	STK10	0.053	NA	2	Bosutinib	Kinases, kinases	0.00549557	NA
LIHC	TP53	YES1	0.0272	NA	2	Dasatinib	Kinases	0.00644064	NA
LUAD	TP53	ABL1	0.0151	NA	2	Dasatinib	Kinases	0.00644064	NA
LUAD	TP53	ABL1	0.0151	NA	2	Nilotinib	ABL signaling	0.0105721	NA
LUAD	TP53	ABL1	0.0151	NA	2	Bosutinib	Kinases, kinases	0.00549557	NA
LUAD	TP53	ABL2	0.00605	NA	2	Dasatinib	Kinases	0.00644064	NA
LUAD	TP53	ABL2	0.00605	NA	2	Nilotinib	ABL signaling	0.0105721	NA
LUAD	TP53	ABL2	0.00605	NA	2	Bosutinib	Kinases, kinases	0.00549557	NA
LUAD	TP53	DDB1	0.036	NA	2	Lenalidomide	Protein stability and degradation	0.0517071	NA
LUAD	TP53	DDR2	0.0931	NA	2	Nilotinib	ABL signaling	0.0105721	NA
LUAD	TP53	DDR2	0.0931	NA	2	Dasatinib	Kinases	0.00644064	NA
LUAD	TP53	FYN	0.0796	NA	2	Dasatinib	Kinases	0.00644064	NA
LUAD	TP53	FYN	0.0796	NA	2	Bosutinib	Kinases, kinases	0.00549557	NA
LUAD	TP53	HCK	0.0747	NA	2	Bosutinib	Kinases, kinases	0.00549557	NA
LUAD	TP53	HCK	0.0747	NA	2	Dasatinib	Kinases	0.00644064	NA
LUAD	TP53	HDAC4	0.0126	NA	2	Vorinostat	Chromatin histone acetylation	0.00387802	NA
LUAD	TP53	HDAC9	0.0956	NA	2	Vorinostat	Chromatin histone acetylation	0.00387802	NA
LUAD	TP53	KDR	0.032	NA	2	Axitinib	RTK signaling	9.32585e-06	NA
LUAD	TP53	KDR	0.032	NA	2	Midostaurin	Kinases	9.57562e-09	NA
LUAD	TP53	MTOR	0.0499	NA	2	Temsirolimus	PI3K/MTOR signaling	0.030214	NA
LUAD	TP53	NOS2	0.0363	NA	2	Nilotinib	ABL signaling	0.0105721	NA
LUAD	TP53	PSMD1	0.0703	NA	2	Bortezomib	Protein stability and degradation	0.0209589	NA
LUAD	TP53	PSMD10	0.0431	NA	2	Bortezomib	Protein stability and degradation	0.0209589	NA
LUAD	TP53	PSMD2	0.0849	NA	2	Bortezomib	Protein stability and degradation	0.0209589	NA
LUAD	TP53	STAT5B	0.0617	NA	2	Dasatinib	Kinases	0.00644064	NA
LUAD	TP53	STK4	0.0856	NA	2	Bosutinib	Kinases, kinases	0.00549557	NA
LUSC	BRCA2	BRAF	0.0615	NA	2	Dabrafenib	ERK MAPK signaling	0.000315445	NA
LUSC	BRCA2	BRAF	0.0615	NA	2	Temsirolimus	PI3K/MTOR signaling	0.000978067	NA
LUSC	BRCA2	CAMK2G	0.00902	NA	2	Bosutinib	Kinases, kinases	0.082348	NA
LUSC	BRCA2	MAP2K6	0.0655	NA	2	Trametinib	ERK MAPK signaling	7.86565e-06	NA
LUSC	BRCA2	TNFSF11	0.0282	NA	2	Lenalidomide	Protein stability and degradation	0.0192273	NA
LUSC	BRCA2	TNK2	0.0282	NA	2	Bosutinib	Kinases, kinases	0.082348	NA
LIHC	BRCA2	CDK6	0.0167	NA	2	Palbociclib	Cell cycle	0.0873147	NA
LIHC	BRCA2	HDAC8	0.0125	NA	2	Vorinostat	Chromatin histone acetylation	6.59835e-06	NA
LIHC	BRCA2	MAP2	0.0905	NA	2	Docetaxel	Mitosis	5.6481e-06	NA
HNSC	ATR	BCR	0.0782	NA	3	Bosutinib	Kinases, kinases	0.0034745	NA
HNSC	ATR	HDAC10	0.0185	NA	3	Belinostat	Chromatin histone acetylation	1.30333e-20	NA
HNSC	ATR	HDAC10	0.0185	NA	3	Vorinostat	Chromatin histone acetylation	2.13109e-12	NA
HNSC	ATR	MAP4	0.0502	NA	3	Paclitaxel	Mitosis	3.13525e-11	NA
HNSC	ATR	MAP4	0.0502	NA	3	Docetaxel	Mitosis	0.00847561	NA
HNSC	ATR	PSMA1	0.00663	NA	3	Bortezomib	Protein stability and degradation	2.28632e-17	NA
HNSC	ATR	PSMC3IP	0.0306	NA	3	Bortezomib	Protein stability and degradation	2.28632e-17	NA
HNSC	ATR	PSME4	0.0654	NA	3	Bortezomib	Protein stability and degradation	2.28632e-17	NA
HNSC	ATR	TXK	0.0718	NA	3	Bosutinib	Kinases, kinases	0.0034745	NA
HNSC	CHEK2	BCR	0.0983	NA	3	Dasatinib	Kinases	2.30318e-41	NA
HNSC	TP53BP1	PDGFRB	0.0113	NA	3	Midostaurin	Kinases	7.58377e-05	NA
HNSC	TP53BP1	PRKD1	0.0121	NA	3	Midostaurin	Kinases	7.58377e-05	NA
BRCA	TP53BP1	C1R	0.0204	NA	3	Cetuximab	EGFR signaling	0.0146741	NA
BRCA	TP53BP1	FCGR2B	0.0343	NA	3	Cetuximab	EGFR signaling	0.0146741	NA
BRCA	PALB2	FCGR3B	0.0979	NA	3	Cetuximab	EGFR signaling	6.00208e-07	NA
BRCA	PALB2	FLT3	0.0701	NA	3	Midostaurin	Kinases	0.0562968	NA
BRCA	PALB2	LYN	0.0979	NA	3	Dasatinib	Kinases	1.17129e-05	NA
BRCA	PALB2	MAP2K4	0.0979	NA	3	Trametinib	ERK MAPK signaling	0.0450449	NA
BRCA	PALB2	MAP2K6	0.0401	NA	3	Trametinib	ERK MAPK signaling	0.0450449	NA
BRCA	PALB2	PRKCG	0.0979	NA	3	Midostaurin	Kinases	0.0562968	NA
BRCA	PALB2	SIK2	0.0401	NA	3	Dasatinib	Kinases	1.17129e-05	NA
BRCA	PALB2	SRC	0.0701	NA	3	Dasatinib	Kinases	1.17129e-05	NA
BRCA	PALB2	TUBB	0.0701	NA	3	Docetaxel	Mitosis	0.0418576	NA
LUAD	ATR	RXRG	0.0177	NA	3	Bexarotene	Retinoid X receptors	0.0739821	NA
CESC	TP53BP1	PRKCE	0.0532	NA	3	Midostaurin	Kinases	7.58377e-05	NA
BRCA	ATR	FOLH1	0.0455	NA	3	Docetaxel	Mitosis	0.00847561	NA
BRCA	ATR	HDAC1	0.0982	NA	3	Vorinostat	Chromatin histone acetylation	2.13109e-12	NA
BRCA	ATR	HDAC1	0.0982	NA	3	Belinostat	Chromatin histone acetylation	1.30333e-20	NA
BRCA	ATR	LIMK1	0.0804	NA	3	Dabrafenib	ERK MAPK signaling	0.0171511	NA
BRCA	ATR	MAP4	0.0137	NA	3	Paclitaxel	Mitosis	3.13525e-11	NA
BRCA	ATR	MAP4	0.0137	NA	3	Docetaxel	Mitosis	0.00847561	NA
BRCA	ATR	PDGFRB	0.0581	NA	3	Midostaurin	Kinases	0.000137938	NA
BRCA	ATR	PIK3CB	0.0308	NA	3	Idelalisib	PI3K/MTOR signaling	5.88414e-11	NA
BRCA	ATR	PRKCA	0.0455	NA	3	Midostaurin	Kinases	0.000137938	NA
BRCA	ATR	PRKCE	0.0303	NA	3	Midostaurin	Kinases	0.000137938	NA
BRCA	ATR	PRKD1	0.0455	NA	3	Midostaurin	Kinases	0.000137938	NA
BRCA	ATR	PSMC4	0.0698	NA	3	Bortezomib	Protein stability and degradation	2.28632e-17	NA
BRCA	ATR	RXRG	0.0838	NA	3	Bexarotene	Retinoid X receptors	0.0739821	NA
PRAD	CHEK2	ABL1	0.0242	NA	3	Dasatinib	Kinases	2.30318e-41	NA
PRAD	CHEK2	HDAC7	0.0749	NA	3	Belinostat	Chromatin histone acetylation	0.000811327	NA
PRAD	CHEK2	HDAC7	0.0749	NA	3	Vorinostat	Chromatin histone acetylation	0.000617456	NA
PRAD	CHEK2	MAP2K1	0.0172	NA	3	Trametinib	ERK MAPK signaling	0.0829268	NA
PRAD	CHEK2	PSMA1	0.00667	NA	3	Bortezomib	Protein stability and degradation	6.83335e-23	NA
PRAD	CHEK2	PSMD5	0.0579	NA	3	Bortezomib	Protein stability and degradation	6.83335e-23	NA
PRAD	CHEK2	TUBA1C	0.0643	NA	3	Paclitaxel	Mitosis	9.52731e-05	NA
KIRC	CHEK2	PRKCH	0.0363	NA	3	Midostaurin	Kinases	2.02576e-05	NA
KIRC	CHEK2	TUBA1A	0.0363	NA	3	Paclitaxel	Mitosis	9.52731e-05	NA
SKCM	CHEK2	ABL2	0.0896	NA	3	Dasatinib	Kinases	2.30318e-41	NA
SKCM	CHEK2	HDAC9	0.0896	NA	3	Belinostat	Chromatin histone acetylation	0.000811327	NA
SKCM	CHEK2	HDAC9	0.0896	NA	3	Vorinostat	Chromatin histone acetylation	0.000617456	NA
SKCM	CHEK2	MAP2	0.0896	NA	3	Paclitaxel	Mitosis	9.52731e-05	NA
SKCM	CHEK2	PRKD1	0.0896	NA	3	Midostaurin	Kinases	2.02576e-05	NA
SKCM	CHEK2	SIK2	0.0896	NA	3	Dasatinib	Kinases	2.30318e-41	NA
KIRC	FANCE	ERBB2	0.0845	NA	3	Gefitinib	EGFR signaling	0.00147952	NA
KIRC	FANCE	PDGFRA	0.0907	NA	3	Midostaurin	Kinases	9.8596e-08	NA
KIRC	FANCE	PSMC5	0.0936	NA	3	Bortezomib	Protein stability and degradation	3.82669e-06	NA
KIRC	FANCE	SIK3	0.0872	NA	3	Bosutinib	Kinases, kinases	4.36722e-37	NA
KIRC	FANCE	STK10	0.0187	NA	3	Bosutinib	Kinases, kinases	4.36722e-37	NA
LIHC	ATR	CAMK2G	0.0599	NA	3	Bosutinib	Kinases, kinases	0.0034745	NA
LIHC	ATR	HDAC9	0.00668	NA	3	Belinostat	Chromatin histone acetylation	1.30333e-20	NA
LIHC	ATR	HDAC9	0.00668	NA	3	Vorinostat	Chromatin histone acetylation	2.13109e-12	NA
LIHC	ATR	KIT	0.0602	NA	3	Midostaurin	Kinases	0.000137938	NA
LIHC	ATR	MAP2K4	0.0701	NA	3	Trametinib	ERK MAPK signaling	0.0265115	NA
LIHC	ATR	PIK3CG	0.00899	NA	3	Idelalisib	PI3K/MTOR signaling	5.88414e-11	NA
LIHC	ATR	PRKCH	0.0913	NA	3	Midostaurin	Kinases	0.000137938	NA
LIHC	ATR	PRKCQ	0.024	NA	3	Midostaurin	Kinases	0.000137938	NA
LIHC	ATR	PSMB10	0.024	NA	3	Bortezomib	Protein stability and degradation	2.28632e-17	NA
LIHC	ATR	PSMB2	0.0467	NA	3	Bortezomib	Protein stability and degradation	2.28632e-17	NA
LIHC	ATR	PSMC1	0.0722	NA	3	Bortezomib	Protein stability and degradation	2.28632e-17	NA
LIHC	ATR	PSMD12	0.0599	NA	3	Bortezomib	Protein stability and degradation	2.28632e-17	NA
LIHC	ATR	PSME1	0.024	NA	3	Bortezomib	Protein stability and degradation	2.28632e-17	NA
LIHC	ATR	STK10	0.00899	NA	3	Bosutinib	Kinases, kinases	0.0034745	NA
LIHC	ATR	TUBA1A	0.0059	NA	3	Paclitaxel	Mitosis	3.13525e-11	NA
